# Supplementary material
Source: publisher figshare collection journal article supplement (https://gsajournals.figshare.com/ndownloader/files/16411760)
Supplement: Supplementary file 1 [file 16411760]

## Sheet: Ler_ult1-3
Table S2. Genes differentially expressed between Ler and ult1-3 4 DAG vegetative apices, p-value ≤ 0.05, FC ≥ 1.5
Array element	ID	Locus	Description	logFC	FC, ult1-3, 4D	AveExpr (log2)	AveExpresn	t	p-value	adj. p-value
254452_at	9552	AT4G21100	DDB1B (DAMAGED DNA BINDING PROTEIN 1 B)	-2.64039	0.160385	6.37235	82.8457	-19.5676	7.69573e-08	0.000292566
253532_at	8632	AT4G31570	nucleoporin protein	-2.40911	0.188272	5.71599	52.5636	-9.42262	1.71218e-05	0.00589226
258897_at	13997	AT3G05730	defensin-like (DEFL) family protein	-2.25982	0.208798	6.70288	104.176	-9.33261	1.83361e-05	0.00589226
261618_at	16718	AT1G33110	MATE efflux family protein	-2.13973	0.226923	6.86253	116.366	-9.65934	1.43362e-05	0.0052942
262373_at	17473	AT1G73120	F-box/RNI superfamily protein	-1.85159	0.277087	7.79548	222.163	-8.11469	4.9183e-05	0.0109987
257634_s_at	12734	AT3G26170;AT3G26180	[AT3G26170, CYP71B19 (cytochrome P450, family 71, subfamily B, polypeptide 19); oxygen binding];[AT3G26180, CYP71B20 (cytochrome P450, family 71, subfamily B, polypeptide 20); oxygen binding]	-1.82451	0.282336	8.85428	462.812	-11.7208	3.52464e-06	0.00236462
261782_at	16882	AT1G76110	high mobility group (HMG1/2) family protein / ARID/BRIGHT DNA-binding domain-containing protein	-1.82011	0.283199	6.52142	91.8632	-8.24064	4.41686e-05	0.0102805
263231_at	18331	AT1G05680	UDP-glucoronosyl/UDP-glucosyl transferase family protein	-1.77079	0.293049	6.69339	103.493	-8.69241	3.03599e-05	0.00858623
251196_at	6296	AT3G62950	glutaredoxin family protein	-1.62408	0.324417	5.7843	55.1121	-6.14563	0.000322165	0.0289898
246380_at	1480	AT1G57750	cytochrome P450, putative	-1.59374	0.331312	6.2217	74.6307	-7.42514	9.08557e-05	0.0161028
253689_at	8789	AT4G29770	HTT1 (HEAT-INDUCED TAS1 TARGET 1)	-1.58698	0.332868	6.12933	70.0023	-13.5199	1.22965e-06	0.00127492
253945_at	9045	AT4G27050	F-box family protein	-1.57254	0.336216	8.30089	315.367	-20.6905	5.04539e-08	0.000273488
263840_at	18940	AT2G36885	translation initiation factor protein	-1.57165	0.336423	8.65714	403.701	-15.7925	3.86207e-07	0.000800854
257417_at	12517	AT1G10110	F-box family protein	-1.55918	0.339343	5.69952	51.9667	-9.65428	1.43902e-05	0.0052942
245646_x_at	746	AT1G25112;AT1G24851;AT1G25025;AT1G25180	[AT1G25112, similar to unknown protein [Arabidopsis thaliana] (TAIR:AT1G25025.1); similar to unknown protein [Arabidopsis thaliana] (TAIR:AT1G25180.1); similar to PREDICTED: hypothetical protein [Homo sapiens] (GB:XP_001129546.1)];[AT1G24851, similar to unknown protein [Arabidopsis thaliana] (TAIR:AT1G25112.1); similar to unknown protein [Arabidopsis thaliana] (TAIR:AT1G25025.1); similar to unkno…	-1.53713	0.344571	5.42219	42.8788	-5.97505	0.000386795	0.0310662
253835_at	8935	AT4G27820	glycosyl hydrolase family 1 protein	-1.51314	0.350347	7.68742	206.131	-8.4545	3.69101e-05	0.00927357
248377_at	3477	AT5G51720	NEET GROUP PROTEIN	-1.49825	0.353982	9.62786	791.18	-10.5447	7.61829e-06	0.00377768
262319_s_at	17419	AT1G27580;AT1G27540	[AT1G27580, F-box family protein];[AT1G27540, F-box family protein]	-1.47804	0.358976	11.4627	2822.46	-17.4206	1.84897e-07	0.000562494
252300_at	7400	AT3G49160	pyruvate kinase family protein	-1.43772	0.36915	5.76021	54.1997	-5.93025	0.000406065	0.0320278
248864_at	3964	AT5G46760	MYC3; basic helix-loop-helix (bHLH) family protein	-1.35785	0.390162	8.03481	262.252	-12.0711	2.83952e-06	0.00214419
253957_at	9057	AT4G26320	AGP13 (ARABINOGALACTAN PROTEIN 13)	-1.35649	0.390532	6.85032	115.386	-9.75443	1.33634e-05	0.00516642
256603_at	11703	AT3G28270	AFL1, AT14A-LIKE1	-1.29671	0.407054	5.6738	51.0487	-6.02662	0.000365857	0.0302362
253412_at	8512	AT4G33000	CBL10 (calcineurin B-like protein 10); calcium ion binding	-1.29424	0.407752	9.53229	740.468	-8.57167	3.35055e-05	0.00878461
248841_at	3941	AT5G46740	UBP21 (UBIQUITIN-SPECIFIC PROTEASE 21); ubiquitin-specific protease	-1.25259	0.419694	7.60091	194.135	-12.6711	1.98662e-06	0.00168016
250152_at	5252	AT5G15120	PCO1, PLANT CYSTEINE OXIDASE 1	-1.24676	0.421393	6.07786	67.5488	-5.15779	0.000978196	0.0460055
248863_at	3963	AT5G46750	AGD8 (ARF-GAP DOMAIN 8); DNA binding protein	-1.23818	0.423907	9.8302	910.3	-16.5723	2.6908e-07	0.000681968
257823_at	12923	AT3G25190	ATVTL5 (VACUOLAR IRON TRANSPORTER-LIKE 5)	-1.22692	0.427229	8.47654	356.2	-8.3016	4.19492e-05	0.0101794
264436_at	19536	AT1G10370	ATGSTU17/ERD9/GST30/GST30B (EARLY-RESPONSIVE TO DEHYDRATION 9, GLUTATHIONE S-TRANSFERASE 30, GLUTATHIONE S-TRANSFERASE 30B); glutathione transferase	-1.20826	0.43279	8.21425	296.986	-6.43154	0.000239002	0.0261525
253233_at	8333	AT4G34290	SWIB3; SWIB complex BAF60b domain-containing protein	-1.18267	0.440536	9.06608	535.998	-7.36549	9.60107e-05	0.0162716
259441_at	14541	AT1G02300	cathepsin B-like cysteine protease, putative	-1.15229	0.449912	7.7857	220.663	-9.31119	1.86391e-05	0.00590497
246705_x_at	1805	AT5G28120;AT5G28110	[AT5G28120, similar to unknown protein [Arabidopsis thaliana] (TAIR:AT5G28110.1)];[AT5G28110, similar to unknown protein [Arabidopsis thaliana] (TAIR:AT5G28120.1)]	-1.1481	0.451218	4.30311	19.7408	-10.0072	1.11185e-05	0.00478513
253971_at	9071	AT4G26530	fructose-bisphosphate aldolase, putative	-1.11854	0.46056	7.82277	226.406	-5.01636	0.00115918	0.0499969
246080_at	1180	AT5G20460	unknown protein	-1.11474	0.461774	5.06177	33.3999	-6.77842	0.000168479	0.0218401
263831_at	18931	AT2G40300	ATFER4 (FERRITIN 4); ferric iron binding	-1.1137	0.462108	8.73988	427.528	-9.33965	1.82377e-05	0.00589226
267459_at	22559	AT2G33850	E6-like protein	-1.08902	0.47008	7.13381	140.44	-6.91008	0.000148053	0.0208462
262281_at	17381	AT1G68570	proton-dependent oligopeptide transport (POT) family protein	-1.07536	0.474553	7.58363	191.823	-11.9767	3.00807e-06	0.00214419
256139_at	11239	AT1G48660	auxin-responsive GH3 family protein	-1.05561	0.481093	5.05564	33.2582	-7.91924	5.82722e-05	0.0119747
250073_at	5173	AT5G17170	rubredoxin family protein	-1.03362	0.488484	10.7921	1773.19	-9.11288	2.17269e-05	0.00652091
256889_at	11989	AT3G24010	ATING1 (ARABIDOPSIS THALIANA INHIBITOR OF GROWTH 1); PHD finger family protein	-1.02007	0.493092	8.72345	422.688	-10.0859	1.05077e-05	0.0047798
252961_at	8061	AT4G38760	nucleoporin protein	-1.01846	0.493643	6.09309	68.2656	-5.45257	0.000692858	0.0385466
251109_at	6209	AT5G01600	ATFER1 (ferretin 1); ferric iron binding	-1.00782	0.497299	10.5017	1449.84	-5.35707	0.000773751	0.0414302
260396_at	15496	AT1G69720	HO3 (HEME OXYGENASE 3); heme oxygenase (decyclizing)	-0.991331	0.503013	4.99366	31.8597	-8.25699	4.35608e-05	0.0102435
259517_at	14617	AT1G20630	CAT1 (CATALASE 1); catalase	-0.981581	0.506424	8.75236	431.243	-8.13717	4.82432e-05	0.0108953
261785_at	16885	AT1G08230	GABA transporter family protein	-0.979881	0.507022	6.79767	111.251	-5.88768	0.000425362	0.0320278
260872_at	15972	AT1G21350	thioredoxin superfamily protein	-0.976948	0.508053	8.45206	350.206	-9.18151	2.05978e-05	0.00626447
254001_at	9101	AT4G26260	MIOX4 (MYO-INOSITOL OXYGENASE 4)	-0.959204	0.514341	5.08972	34.0532	-7.35629	9.68345e-05	0.0162716
264513_at	19613	AT1G09420	G6PD4 (GLUCOSE-6-PHOSPHATE DEHYDROGENASE 4); glucose-6-phosphate 1-dehydrogenase	-0.957246	0.515039	8.30446	316.148	-8.51847	3.50058e-05	0.00907366
253514_at	8614	AT4G31805	POLAR (POLAR LOCALIZATION DURING ASYMMETRIC DIVISION AND REDISTRIBUTION); WRKY family transcription factor	-0.934727	0.523141	6.50418	90.772	-5.67675	0.000537201	0.0350101
253052_at	8152	AT4G37310	CYP81H1 (cytochrome P450, family 81, subfamily H, polypeptide 1); oxygen binding	-0.913899	0.530749	7.84052	229.21	-8.06698	5.12459e-05	0.0111283
254011_at	9111	AT4G26370	antitermination NusB domain-containing protein	-0.902238	0.535056	8.6909	413.26	-5.31543	0.000812243	0.0422199
263595_at	18695	AT2G01890	PAP8 (PURPLE ACID PHOSPHATASE PRECURSOR); acid phosphatase/ protein serine/threonine phosphatase	-0.900767	0.535602	9.1583	571.376	-6.22966	0.000294803	0.028123
260169_at	15269	AT1G71990	FUT13 (fucosyltransferase 13); fucosyltransferase/ transferase, transferring glycosyl groups	-0.898042	0.536615	8.02123	259.796	-9.67608	1.41594e-05	0.0052942
258181_at	13281	AT3G21670	nitrate transporter (NTP3)	-0.897629	0.536768	9.80292	893.251	-5.34649	0.000783335	0.0417474
258252_at	13352	AT3G15720	glycoside hydrolase family 28 protein / polygalacturonase (pectinase) family protein	-0.897566	0.536792	5.89966	59.7002	-5.82322	0.000456536	0.0327359
251735_at	6835	AT3G56090	ATFER3 (FERRITIN 3); ferric iron binding	-0.880961	0.543006	9.00584	514.076	-7.98864	5.48459e-05	0.0114774
253951_at	9051	AT4G26860	alanine racemase family protein	-0.879364	0.543607	9.19188	584.834	-5.86129	0.00043783	0.0320278
248491_at	3591	AT5G51010	rubredoxin family protein	-0.863005	0.549806	10.4981	1446.28	-12.0571	2.86388e-06	0.00214419
254327_at	9427	AT4G22490	protease inhibitor/seed storage/lipid transfer protein (LTP) family protein	-0.851364	0.55426	8.27515	309.791	-5.46814	0.000680571	0.0385466
251778_at	6878	AT3G55660	ATROPGEF6/ROPGEF6 (KINASE PARTNER PROTEIN-LIKE); Rho guanyl-nucleotide exchange factor	-0.845513	0.556513	6.09732	68.4663	-5.36483	0.000766804	0.0411548
253302_at	8402	AT4G33660	similar to proline-rich family protein [Arabidopsis thaliana] (TAIR:AT2G41420.1); similar to adhesive/proline-rich protein homolog [Pinus taeda] (GB:AAF75822.1)	-0.843382	0.557335	9.59539	773.571	-5.61684	0.000574625	0.0352348
267509_at	22609	AT2G45660	SOC1 (SUPPRESSOR OF OVEREXPRESSION OF CO 1)/AGL20; transcription factor	-0.835544	0.560372	5.8939	59.4621	-6.71712	0.000179044	0.0226888
257868_at	12968	AT3G25070	RIN4 (RPM1 INTERACTING PROTEIN 4)	-0.822331	0.565527	8.11263	276.787	-9.22055	1.99849e-05	0.0061602
266965_at	22065	AT2G39510	nodulin MtN21 family protein	-0.818619	0.566984	5.62596	49.3835	-6.11431	0.000333076	0.0291682
264466_at	19566	AT1G10380	putative membrane lipoprotein	-0.809297	0.57066	7.47472	177.875	-9.77141	1.31976e-05	0.00516642
264146_at	19246	AT1G02205	CER1 (ECERIFERUM 1)	-0.808294	0.571057	7.10574	137.734	-5.83829	0.00044903	0.0323103
245197_at	297	AT1G67800	copine (calcium-dependent phospholipid-binding protein)	-0.8065	0.571767	6.50322	90.7121	-6.52757	0.000216658	0.0249594
262277_at	17377	AT1G68650	similar to unknown protein [Arabidopsis thaliana] (TAIR:AT1G25520.1); similar to Os08g0433100 [Oryza sativa (japonica cultivar-group)] (GB:NP_001061871.1); similar to PREDICTED: similar to conserved hypothetical protein [Strongylocentrotus purpuratus] (GB:XP_798718.2); contains InterPro domain Protein of unknown function UPF0016; (InterPro:IPR001727)	-0.805537	0.572149	7.17585	144.592	-6.93147	0.000145002	0.0206633
257502_at	12602	AT1G78110	nucleolar GTP-binding protein	-0.800868	0.574004	8.09032	272.539	-5.59237	0.000590733	0.0359323
265025_at	20125	AT1G24575	DEAD-box ATP-dependent RNA helicase-like protein	-0.797058	0.575522	6.24936	76.0753	-7.70713	7.03169e-05	0.0137088
249037_at	4137	AT5G44130	fasciclin-like arabinogalactan-protein, putative	-0.789977	0.578353	9.23335	601.889	-6.41577	0.000242909	0.0261525
253788_at	8888	AT4G28680	TyrDC tyrosine decarboxylase protein	-0.785412	0.580186	5.73101	53.1135	-5.19939	0.000931055	0.04509
255305_at	10405	AT4G04770	ATABC1 (ARABIDOPSIS THALIANA NUCLEOSOME ASSEMBLY PROTEIN 1)	-0.780965	0.581977	10.0467	1057.7	-9.26032	1.93814e-05	0.00605603
254764_at	9864	AT4G13250	short-chain dehydrogenase/reductase (SDR) family protein	-0.776383	0.583829	9.79311	887.199	-6.80888	0.000163489	0.0218401
259363_at	14463	AT1G13270	MAP1C (METHIONINE AMINOPEPTIDASE 1B); metalloexopeptidase	-0.775876	0.584034	8.90419	479.101	-5.31582	0.000811866	0.0422199
261001_at	16101	AT1G26530	PIN domain-like family protein	-0.753822	0.59303	4.25439	19.0853	-6.3636	0.000256351	0.0263536
261311_at	16411	AT1G05770	mannose-binding lectin family protein	-0.741452	0.598137	5.12539	34.9056	-5.79589	0.000470512	0.0332272
260805_at	15905	AT1G78320	ATGSTU23 (Arabidopsis thaliana Glutathione S-transferase (class tau) 23); glutathione transferase	-0.73288	0.601702	5.67623	51.1345	-6.9379	0.000144098	0.0206633
249289_at	4389	AT5G41040	ASFT (ALIPHATIC SUBERIN FERULOYL-TRANSFERASE)	-0.727897	0.603783	7.03398	131.05	-7.40729	9.23657e-05	0.0162066
253002_at	8102	AT4G38530	ATPLC1 (PHOSPHOLIPASE C 1); phospholipase C	-0.719006	0.607516	7.16635	143.644	-6.70456	0.000181297	0.0227683
253393_at	8493	AT4G32690	GLB3 (2-on-2 hemoglobin like gene 3)	-0.712045	0.610454	7.02169	129.939	-6.65884	0.000189774	0.0231483
266165_at	21265	AT2G28190	CSD2 (COPPER/ZINC SUPEROXIDE DISMUTASE 2); copper, zinc superoxide dismutase	-0.711084	0.610861	11.6505	3214.77	-7.08477	0.000125076	0.0187697
249826_at	4926	AT5G23310	FSD3 (FE SUPEROXIDE DISMUTASE 3); iron superoxide dismutase	-0.709361	0.611591	9.08808	544.233	-8.0861	5.04075e-05	0.0111134
258034_at	13134	AT3G21300	TRM2A (TRNA METHYLTRANSFERASE 2A); RNA methyltransferase family protein	-0.70644	0.61283	7.13594	140.647	-5.9123	0.000414079	0.0320278
260004_at	15104	AT1G67860	transmembrane protein; similar to unknown protein [Arabidopsis thaliana] (TAIR:AT1G67865.1)	-0.695603	0.617451	5.81597	56.3354	-6.16035	0.000317177	0.0289898
263168_at	18268	AT1G03020	ROXY16 (CC-type glutaredoxin family protein)	-0.687379	0.620981	4.80346	27.9245	-6.35779	0.0002579	0.0263798
261712_at	16812	AT1G32780	GroES-like zinc-binding dehydrogenase family protein	-0.684383	0.622272	5.70659	52.2223	-6.10025	0.000338106	0.0291682
256978_at	12078	AT3G21110	PUR7 (purin 7); phosphoribosylaminoimidazolesuccinocarboxamide synthase	-0.681589	0.623478	7.87691	235.064	-7.65587	7.3629e-05	0.0140849
261084_at	16184	AT1G07440	NAD(P)-binding Rossmann-fold superfamily protein	-0.676839	0.625534	7.69709	207.518	-7.58604	7.84241e-05	0.0146627
257678_at	12778	AT3G20420	RTL2 (RNASE THREE-LIKE PROTEIN 2); double-stranded RNA binding / ribonuclease III	-0.674679	0.626471	5.71398	52.4902	-5.72073	0.000511438	0.0341108
260684_at	15784	AT1G17590	NF-YA8 (NUCLEAR FACTOR Y SUBUNIT A8); CCAAT-binding transcription factor family protein	-0.667082	0.629779	5.28471	38.9814	-5.72805	0.000507287	0.0341108
258107_at	13207	AT3G23560	ALF5 (ABERRANT LATERAL ROOT FORMATION 5); antiporter/ transporter	-0.660837	0.632511	8.2911	313.234	-6.14385	0.000322774	0.0289898
259843_at	14943	AT1G73570	HCP-like superfamily protein	-0.660428	0.632691	5.77891	54.9068	-5.69171	0.000528279	0.0347263
260283_at	15383	AT1G80480	PTAC17 (PLASTID TRANSCRIPTIONALLY ACTIVE17)	-0.65982	0.632957	9.5059	727.044	-6.80086	0.000164787	0.0218401
259180_at	14280	AT3G01680	SEOR1 (SIEVE-ELEMENT-OCCLUSION-RELATED 1)	-0.659278	0.633195	9.001	512.356	-8.50242	3.5473e-05	0.00909145
255142_at	10242	AT4G08390	SAPX; L-ascorbate peroxidase	-0.658735	0.633433	9.66888	813.998	-5.87457	0.000431504	0.0320278
265032_at	20132	AT1G61580	ARP2/RPL3B (ARABIDOPSIS RIBOSOMAL PROTEIN 2); structural constituent of ribosome	-0.658545	0.633517	7.19264	146.285	-5.31372	0.000813864	0.0422199
258802_at	13902	AT3G04650	FAD/NAD(P)-binding oxidoreductase family protein	-0.654416	0.635333	7.36609	164.974	-5.6399	0.000559891	0.0352348
264839_at	19939	AT1G03630	POR C (PROTOCHLOROPHYLLIDE OXIDOREDUCTASE); NADPH dehydrogenase/ oxidoreductase/ protochlorophyllide reductase	-0.651868	0.636456	10.1624	1146	-5.09389	0.00105581	0.0473365
260112_at	15212	AT1G63310	similar to oxidoreductase, acting on NADH or NADPH [Arabidopsis thaliana] (TAIR:AT1G75260.1); similar to Os04g0105200 [Oryza sativa (japonica cultivar-group)] (GB:NP_001052007.1); similar to B0616E02-H0507E05.1 [Oryza sativa (indica cultivar-group)] (GB:CAH67825.1)	-0.647691	0.638301	7.35683	163.918	-8.59012	3.30022e-05	0.00875325
264698_at	19798	AT1G70200	HPE1/RBD1 (HIGH PHOTOSYNTHETIC EFFICIENCY 1); RNA binding protein	-0.643349	0.640225	8.69307	413.88	-5.13473	0.00100546	0.0462666
250306_at	5406	AT5G12170	CLT3; CRT-Like transporter protein	-0.643321	0.640238	6.42518	85.9353	-8.66088	3.11482e-05	0.00858623
253472_at	8572	AT4G32230	ATP binding / protein kinase	-0.640282	0.641587	4.31479	19.9014	-5.77597	0.000480992	0.0335518
245701_at	801	AT5G04140	GLU1 (FERREDOXIN-DEPENDENT GLUTAMATE SYNTHASE 1)	-0.639431	0.641966	11.8943	3806.73	-5.24872	0.00087836	0.0441308
262730_at	17830	AT1G16390	OCT3 (ORGANIC CATION/CARNITINE TRANSPORTER 3_	-0.637769	0.642706	7.75696	216.311	-5.41077	0.000727058	0.0397892
247092_at	2192	AT5G66380	ATFOLT1 (ARABIDOPSIS THALIANA FOLATE TRANSPORTER 1); binding / folic acid transporter	-0.629347	0.646469	7.65182	201.108	-7.13848	0.000118831	0.0181915
250146_at	5246	AT5G14660	PDF1B (PEPTIDE DEFORMYLASE 1B); peptide deformylase	-0.62716	0.64745	8.97616	503.609	-6.4846	0.000226355	0.0255602
260200_at	15300	AT1G67620	Lojap-related protein	-0.623252	0.649206	7.25711	152.97	-6.88731	0.00015138	0.0211839
263864_at	18964	AT2G04530	TRZ2 (TRNASE Z 2); protein with RNAse Z activity	-0.622329	0.649621	7.7805	219.869	-5.62338	0.000570404	0.0352348
253566_at	8666	AT4G31210	DNA topoisomerase type 1A family protein	-0.622174	0.649691	7.98677	253.663	-6.07837	0.000346103	0.0293153
259914_at	15014	no_match	no_match	-0.621169	0.650144	6.49776	90.3691	-7.16683	0.000115676	0.0180724
260948_at	16048	AT1G06100	fatty acid desaturase family protein	-0.61971	0.650802	4.73994	26.7217	-5.53311	0.000631846	0.0376303
259166_at	14266	AT3G01670	similar to unknown protein [Arabidopsis thaliana] (TAIR:AT3G01680.1); similar to conserved hypothetical protein [Medicago truncatula] (GB:ABD32254.1)	-0.617072	0.651993	8.66951	407.177	-7.84672	6.211e-05	0.0124274
258128_at	13228	AT3G24590	signal peptidase PlspI family protein	-0.61462	0.653102	9.80199	892.677	-5.46508	0.000682969	0.0385466
251008_at	6108	AT5G02710	zinc/iron-chelating domain protein	-0.611515	0.654509	8.10902	276.095	-7.22181	0.000109818	0.0173955
249718_at	4818	AT5G35740	Carbohydrate-binding X8 domain superfamily protein	-0.610774	0.654845	7.85044	230.791	-6.83836	0.000158816	0.0218228
246687_at	1787	AT5G33370	CUS2 (CUTIN SYNTHASE2); GDSL-motif lipase/hydrolase family protein	-0.60075	0.659411	4.74685	26.8499	-6.12891	0.000327939	0.0291682
266978_at	22078	AT2G39430	disease resistance-responsive protein-related / dirigent protein-related	-0.598079	0.660633	6.94071	122.846	-5.38857	0.000745972	0.0402261
256469_at	11569	AT1G32540	LOL1 (LSD ONE LIKE 1)	-0.597957	0.660689	9.26847	616.72	-6.12666	0.000328726	0.0291682
267497_at	22597	AT2G30540	ROXY7; CC-type glutaredoxin (ROXY) family protein	-0.596481	0.661365	7.14139	141.18	-5.77104	0.000483629	0.0336329
259748_at	14848	AT1G71180	6-phosphogluconate dehydrogenase NAD-binding domain-containing protein	-0.596464	0.661373	7.28196	155.628	-7.42261	9.10681e-05	0.0161028
256020_at	11120	AT1G58290	HEMA1; glutamyl-tRNA reductase	-0.587018	0.665718	9.63409	794.605	-6.39068	0.000249273	0.0262696
261338_at	16438	AT1G44920	transmembrane protein; similar to unknown protein [Oryza sativa (japonica cultivar-group)] (GB:AAO38479.1)	-0.586685	0.665871	9.14821	567.396	-5.38274	0.00075103	0.0404033
256866_at	11966	AT3G26380	glycosyl hydrolase family protein 27 / alpha-galactosidase family protein / melibiase family protein	0.587235	1.50236	7.90531	239.737	5.04706	0.00111697	0.0490906
264496_at	19596	AT1G27285	copia-like retrotransposon family transposable element gene	0.58815	1.50332	4.23445	18.8233	5.62145	0.000571648	0.0352348
254766_at	9866	no_match	no_match	0.589638	1.50487	4.46834	22.1363	7.0372	0.000130913	0.0193904
262646_at	17746	AT1G62800	ASP4 (ASPARTATE AMINOTRANSFERASE 4); catalytic/ transaminase/ transferase, transferring nitrogenous groups	0.593852	1.50927	6.40018	84.4589	6.82477	0.000160951	0.0218401
264942_at	20042	AT1G67340	HCP-like superfamily protein with MYND-type zinc finger	0.597584	1.51318	8.50148	362.41	5.67795	0.000536477	0.0350101
247215_at	2315	AT5G64905	PROPEP3 (Elicitor peptide 3 precursor)	0.604693	1.52066	5.40755	42.4459	5.94622	0.000399078	0.0317176
245208_at	308	AT5G12330	LRP1 (LATERAL ROOT PRIMORDIUM 1)	0.611099	1.52742	6.4217	85.7283	5.99851	0.000377113	0.0305034
253334_at	8434	AT4G33360	FLDH (FARNESOL DEHYDROGENASE)	0.616895	1.53357	7.00073	128.064	5.45792	0.000688606	0.0385466
265359_at	20459	AT2G16720	MYB7 (myb domain protein 7); DNA binding / transcription factor	0.617251	1.53395	7.64562	200.244	6.00305	0.000375268	0.0305034
262171_at	17271	AT1G74950	TIFY domain/Divergent CCT motif family protein	0.622251	1.53928	8.77337	437.57	5.29575	0.000831154	0.0426614
263714_at	18814	AT2G20610	SUR1 (SUPERROOT 1); transaminase	0.622533	1.53958	8.63326	397.073	5.07896	0.00107489	0.047981
258207_at	13307	AT3G14050	RSH2 (RELA-SPOT HOMOLOG); catalytic	0.624596	1.54178	8.50214	362.576	6.39846	0.00024728	0.0262347
259846_at	14946	AT1G72140	proton-dependent oligopeptide transport (POT) family protein	0.626163	1.54345	6.71615	105.138	7.3269	9.95195e-05	0.0163894
258424_at	13524	AT3G16750	similar to shell matrix protein [Pinctada fucata] (GB:BAD00044.1)	0.626754	1.54409	3.86879	14.609	6.69632	0.000182794	0.0227683
250289_at	5389	AT5G13190	LITAF domain protein	0.628423	1.54587	9.56109	755.395	5.97747	0.000385783	0.0310662
266832_at	21932	AT2G30040	MAPKKK14 (Mitogen-activated protein kinase kinase kinase 14); kinase	0.631629	1.54931	8.82631	453.923	5.72343	0.000509903	0.0341108
266566_at	21666	AT2G24040	low temperature and salt responsive protein family	0.631774	1.54947	7.8595	232.244	5.6947	0.000526518	0.0347263
258764_at	13864	AT3G10720	plant invertase/pectin methylesterase inhibitor superfamily	0.631815	1.54951	10.1399	1128.28	5.19195	0.000939303	0.0452971
259403_at	14503	AT1G17745	PGDH (3-PHOSPHOGLYCERATE DEHYDROGENASE); phosphoglycerate dehydrogenase	0.640402	1.55876	6.19689	73.3583	7.80568	6.44064e-05	0.0127053
264066_at	19166	AT2G27880	AGO5 (ARGONAUTE5)	0.643864	1.56251	5.11885	34.7477	5.13044	0.00101062	0.0462666
260179_at	15279	AT1G70690	PDLP5 (PLASMODESMATA-LOCATED PROTEIN 5)	0.644623	1.56333	5.37037	41.3659	6.51056	0.00022044	0.0252675
245755_at	855	AT1G35210	similar to unknown protein [Arabidopsis thaliana] (TAIR:AT1G72240.1); similar to Avr9/Cf-9 rapidly elicited protein 75 [Nicotiana tabacum] (GB:AAG43558.1)	0.645569	1.56436	4.89787	29.813	5.86899	0.000434151	0.0320278
261139_at	16239	AT1G19700	BEL10 (BEL1-LIKE HOMEODOMAIN 10); DNA binding / transcription factor	0.650087	1.56926	6.2015	73.5933	5.3178	0.000809994	0.0422199
263475_at	18575	AT2G31945	transmembrane protein	0.656709	1.57648	5.36524	41.2191	6.31504	0.000269608	0.0272113
254333_at	9433	AT4G22753	SMO1-3 (STEROL 4-ALPHA METHYL OXIDASE); catalytic	0.657923	1.57781	6.30288	78.951	6.32723	0.000266211	0.0271084
257053_at	12153	AT3G15210	ATERF-4/ATERF4/ERF4/RAP2.5 (ETHYLENE RESPONSIVE ELEMENT BINDING FACTOR 4); DNA binding / protein binding / transcription factor/ transcriptional repressor	0.657974	1.57786	9.34265	649.258	5.91993	0.000410651	0.0320278
260772_at	15872	AT1G49050	aspartyl protease family protein	0.658706	1.57867	7.54751	187.08	5.14746	0.00099031	0.0462666
249071_at	4171	AT5G44050	ATDTX28; MATE efflux family protein	0.666225	1.58692	5.06637	33.5065	8.45168	3.69967e-05	0.00927357
261443_at	16543	AT1G28480	ROXY19; glutaredoxin family protein	0.667713	1.58855	5.91894	60.5034	6.08846	0.000342389	0.0291723
258641_at	13741	AT3G08030	similar to unknown protein [Arabidopsis thaliana] (TAIR:AT2G41800.1); similar to Os03g0807700 [Oryza sativa (japonica cultivar-group)] (GB:NP_001051644.1); similar to unknown [Ricinus communis] (GB:CAB02653.1); contains InterPro domain Galactose-binding like; (InterPro:IPR008979); contains InterPro domain Protein of unknown function DUF642; (InterPro:IPR006946)	0.667929	1.58879	10.3713	1324.53	6.41856	0.000242214	0.0261525
261143_at	16243	AT1G19770	ATPUP14 (Arabidopsis thaliana purine permease 14); purine transporter	0.669016	1.58999	10.8796	1884.08	5.85832	0.000439259	0.0320278
253606_at	8706	AT4G30530	GGP1 (GAMMA-GLUTAMYL PEPTIDASE 1)	0.669812	1.59087	9.57289	761.599	5.86282	0.000437095	0.0320278
264979_s_at	20079	AT1G27170;AT1G27180	[AT1G27170, disease resistance protein (TIR-NBS-LRR class), putative];[AT1G27180, disease resistance protein (TIR-NBS-LRR class), putative]	0.671014	1.59219	5.03648	32.8195	6.25094	0.000288288	0.0280666
249522_at	4622	AT5G38700	cotton fiber protein	0.671467	1.59269	4.95324	30.9795	6.94125	0.000143631	0.0206633
252921_at	8021	AT4G39030	EDS5 (ENHANCED DISEASE SUSCEPTIBILITY 5); antiporter/ transporter	0.672387	1.59371	4.92579	30.3956	5.23174	0.000896113	0.0443391
254549_at	9649	AT4G19880	glutathione S-transferase family protein	0.673151	1.59455	9.20414	589.824	5.46016	0.000686839	0.0385466
261224_at	16324	AT1G20160	subtilase-like serine protease family protein	0.673594	1.59504	7.06752	134.133	5.53775	0.000628512	0.0376037
250575_at	5675	AT5G08240	transmembrane protein	0.674072	1.59557	6.5172	91.5954	7.85866	6.14591e-05	0.012406
260244_at	15344	AT1G74320	CEK2 (CHOLINE/ETHANOLAMINE KINASE 2)	0.675935	1.59763	6.78154	110.014	8.08007	5.06703e-05	0.0111134
253909_at	9009	AT4G27270	quinone reductase family protein	0.676676	1.59845	6.67217	101.982	6.43423	0.000238342	0.0261525
259055_at	14155	AT3G03340	UNE6 (unfertilized embryo sac 6)	0.678739	1.60074	8.22822	299.875	5.73223	0.000504928	0.0341108
263536_at	18636	AT2G25000	WRKY60 (WRKY DNA-binding protein 60); transcription factor	0.683419	1.60594	5.73341	53.202	5.31407	0.000813529	0.0422199
264624_at	19724	AT1G08930	ERD6 (EARLY RESPONSE TO DEHYDRATION 6); carbohydrate transporter/ sugar porter	0.697849	1.62208	10.3283	1285.64	6.07265	0.000348226	0.0293153
255259_at	10359	AT4G05020	NDB2 (NAD(P)H DEHYDROGENASE B2); disulfide oxidoreductase	0.698064	1.62233	6.61395	97.9487	5.51899	0.000642094	0.0377009
266017_at	21117	AT2G18690	transmembrane protein	0.69824	1.62252	6.38168	83.3831	5.12583	0.0010162	0.0462666
250467_at	5567	AT5G10100	haloacid dehalogenase-like hydrolase (HAD) superfamily protein	0.70329	1.62821	5.96876	62.629	6.15627	0.000318552	0.0289898
247351_at	2451	AT5G63790	ANAC102 (Arabidopsis NAC domain containing protein 102); transcription factor	0.704138	1.62917	9.83507	913.381	5.73228	0.000504904	0.0341108
260660_at	15760	AT1G19485	transducin/WD40 repeat-like superfamily protein	0.707117	1.63254	7.12355	139.445	8.04559	5.22018e-05	0.0111283
263673_at	18773	AT2G04800	hypothetical protein	0.710153	1.63598	5.64188	49.9316	6.62281	0.000196764	0.023376
260429_at	15529	AT1G72450	JAZ6 (JASMONATE-ZIM-DOMAIN PROTEIN 6)	0.713829	1.64015	8.35524	327.476	6.69156	0.000183664	0.0227683
261526_at	16626	AT1G14370	APK2A (PROTEIN KINASE 2A); kinase	0.719523	1.64664	6.66093	101.19	5.50478	0.000652602	0.0379741
251054_at	6154	AT5G01540	LecRHA4.1 (LECTIN RECEPTOR KINASE A4.1)	0.72038	1.64762	5.95144	61.8815	5.1105	0.00103501	0.0468422
260221_at	15321	AT1G74670	GASA6 (GA-STIMULATED ARABIDOPSIS 6)	0.722396	1.64992	12.3088	5073.69	6.41348	0.000243484	0.0261525
260005_at	15105	AT1G67920	similar to unknown protein [Arabidopsis thaliana] (TAIR:AT1G24600.1)	0.724146	1.65192	4.79515	27.7641	8.64444	3.15685e-05	0.00858623
255904_at	11004	AT1G17860	ATKTI5 (ARABIDOPSIS THALIANA KUNITZ TRYPSIN INHIBITOR 5); trypsin and protease inhibitor family protein / Kunitz family protein	0.727336	1.65558	8.65765	403.844	7.93299	5.75749e-05	0.0119389
247727_at	2827	AT5G59490	haloacid dehalogenase-like hydrolase family protein	0.731308	1.66014	5.06811	33.5469	6.53596	0.000214819	0.0249594
254239_at	9339	AT4G23400	PIP1;5/PIP1D (plasma membrane intrinsic protein 1;5); water channel	0.731904	1.66083	11.2984	2518.54	6.92549	0.000145848	0.0206633
252960_at	8060	AT4G38750	similar to Hypothetical protein [Oryza sativa (japonica cultivar-group)] (GB:AAM46049.1)	0.733125	1.66224	7.68262	205.447	10.1273	1.02024e-05	0.00474934
260528_at	15628	AT2G47260	WRKY23 (WRKY DNA-binding protein 23); transcription factor	0.733652	1.66284	5.56013	47.1809	5.57331	0.000603625	0.0365217
251507_at	6607	AT3G59080	aspartyl protease family protein	0.741666	1.67211	7.46097	176.187	5.48933	0.000664237	0.0382796
254809_at	9909	AT4G12410	SAUR35 (SMALL AUXIN UPREGULATED RNA 35); auxin-responsive family protein	0.74336	1.67407	7.13969	141.013	5.13054	0.0010105	0.0462666
260551_at	15651	AT2G43510	ATTI1 (ARABIDOPSIS THALIANA TRYPSIN INHIBITOR PROTEIN 1)	0.75101	1.68297	6.56381	94.6026	5.67306	0.000539426	0.0350446
258249_s_at	13349	AT3G15830;AT3G15820	[AT3G15830, phosphatidic acid phosphatase-related / PAP2-related];[AT3G15820, phosphatidic acid phosphatase-related / PAP2-related]	0.751214	1.68321	8.29509	314.102	6.0958	0.000339715	0.0291682
250815_s_at	5915	AT5G05040;AT5G05060	[AT5G05040, cysteine protease inhibitor];[AT5G05060, similar to cysteine protease inhibitor [Arabidopsis thaliana] (TAIR:AT5G05040.1); contains InterPro domain Arabidopsis thaliana cystatin-related protein; (InterPro:IPR006525)]	0.751229	1.68323	8.72618	423.49	8.27799	4.27936e-05	0.0102435
262637_at	17737	AT1G06640	2-oxoglutarate-dependent dioxygenase, putative	0.758381	1.69159	9.27593	619.918	6.78197	0.00016789	0.0218401
253993_at	9093	AT4G26070	MEK1 (mitogen-activated protein kinase kinase 1); MAP kinase kinase/ kinase	0.759125	1.69246	6.27713	77.5541	5.77931	0.000479218	0.0335518
257407_at	12507	AT1G27100	actin cross-linking protein	0.760288	1.69383	9.05628	532.369	8.00513	5.40654e-05	0.0114188
257824_at	12924	AT3G25290	auxin-responsive family protein	0.760298	1.69384	5.40811	42.4621	5.90046	0.000419462	0.0320278
254040_at	9140	AT4G25900	galactose mutarotase-like superfamily protein	0.76486	1.6992	7.14296	141.333	6.63778	0.000193825	0.0231829
257623_at	12723	AT3G26210	CYP71B23 (cytochrome P450, family 71, subfamily B, polypeptide 23); oxygen binding	0.766349	1.70096	5.02528	32.5657	5.31359	0.00081399	0.0422199
252563_at	7663	AT3G45970	ATEXLA1 (ARABIDOPSIS THALIANA EXPANSIN-LIKE A1)	0.771398	1.70692	10.3062	1266.16	5.40505	0.00073188	0.0398209
260296_at	15396	AT1G63750	disease resistance protein (TIR-NBS-LRR class) family	0.774567	1.71068	4.79115	27.6872	6.64547	0.000192335	0.0231829
252084_at	7184	AT3G51970	ASAT1 (ACYL-COA STEROL ACYL TRANSFERASE 1); long-chain-alcohol O-fatty-acyltransferase family protein / wax synthase family protein	0.778792	1.71569	5.41912	42.7876	6.24896	0.000288886	0.0280666
251178_at	6278	AT3G63440;AT3G63445	[AT3G63440, CKX6 (CYTOKININ OXIDASE/DEHYDROGENASE 6); cytokinin dehydrogenase]	0.779386	1.7164	7.17918	144.926	8.04987	5.2009e-05	0.0111283
249583_at	4683	AT5G37770	TCH2 (TOUCH 2); calcium ion binding	0.786397	1.72476	9.40314	677.059	5.44281	0.000700677	0.0388867
252906_at	8006	AT4G39640	GGT1; gamma-glutamyltransferase/ glutathione gamma-glutamylcysteinyltransferase	0.792841	1.73248	7.42413	171.746	5.72082	0.000511387	0.0341108
265737_at	20837	AT2G01180	ATPAP1 (PHOSPHATIDIC ACID PHOSPHATASE 1); phosphatidate phosphatase	0.795073	1.73517	9.13438	561.982	6.00384	0.000374947	0.0305034
249626_at	4726	AT5G37540	aspartyl protease family protein	0.796276	1.73661	4.70854	26.1464	5.56489	0.000609417	0.0367746
265725_at	20825	AT2G32030	GCN5-related N-acetyltransferase (GNAT) family protein	0.802746	1.74442	5.84443	57.4577	5.87179	0.000432819	0.0320278
249045_at	4145	AT5G44380	FAD-binding Berberine family protein	0.803563	1.74541	8.82394	453.181	5.67079	0.000540803	0.0350446
257101_at	12201	AT3G25020	RBPG1 (RESPONSE TO BOTRYTIS POLYGALACTURONASES 1); receptor like protein	0.808552	1.75145	4.40163	21.136	6.23547	0.000293008	0.028123
266808_at	21908	AT2G29995	PSY3-like protein	0.816195	1.76076	7.10912	138.057	5.96547	0.000390828	0.03128
252997_at	8097	AT4G38400	ATEXLA2 (ARABIDOPSIS THALIANA EXPANSIN-LIKE A2)	0.817279	1.76208	8.33149	322.127	6.05362	0.000355399	0.0296947
264958_at	20058	AT1G76960	transmembrane protein	0.830936	1.77884	4.10755	17.2384	7.13907	0.000118765	0.0181915
257410_at	12510	AT1G24340	EMB2421 (EMBRYO DEFECTIVE 2421); monooxygenase	0.831159	1.77911	7.91625	241.562	5.49437	0.00066042	0.0382796
263034_at	18134	AT1G24020	MLP423 (MLP-LIKE PROTEIN 423)	0.846406	1.79802	8.50333	362.876	7.22902	0.000109075	0.0173955
250475_at	5575	AT5G10180	AST68 (Sulfate transporter 2.1)	0.847127	1.79892	9.13306	561.47	8.15711	4.74266e-05	0.010818
251640_at	6740	AT3G57450	similar to hypothetical protein [Oryza sativa] (GB:AAM08779.1); similar to Os07g0185900 [Oryza sativa (japonica cultivar-group)] (GB:NP_001059068.1)	0.852295	1.80537	10.5302	1478.82	5.6235	0.000570329	0.0352348
253173_at	8273	AT4G35110	phospholipase-like protein (PEARLI 4) family protein	0.85658	1.81074	6.92748	121.725	5.17326	0.000960365	0.0456328
262313_at	17413	AT1G70900	similar to unknown protein [Arabidopsis thaliana] (TAIR:AT1G23110.1); similar to conserved hypothetical protein [Medicago truncatula] (GB:ABE89195.1)	0.856834	1.81106	7.1027	137.444	9.83192	1.26251e-05	0.00514249
265184_at	20284	AT1G23710	hypothetical protein (DUF1645)	0.861341	1.81673	7.02843	130.547	5.1486	0.000988969	0.0462666
258786_at	13886	AT3G11820	SYP121 (SYNTAXIN 121); t-SNARE	0.862025	1.81759	8.7369	426.649	5.20371	0.000926305	0.04509
259834_at	14934	AT1G69570	CDF5, CYCLING DOF FACTOR 5	0.863149	1.819	7.63341	198.557	7.89547	5.95003e-05	0.0121179
262218_at	17318	AT1G74760	zinc finger (C3HC4-type RING finger) family protein	0.863628	1.81961	5.27784	38.7962	6.22208	0.000297161	0.028123
254241_at	9341	AT4G23190	CRK11 (CYSTEINE-RICH RLK11); kinase	0.866941	1.82379	4.75565	27.0144	5.64036	0.000559599	0.0352348
246289_at	1389	AT3G56880	VQ motif-containing protein	0.875983	1.83526	10.438	1387.28	5.66517	0.000544218	0.0351178
262072_at	17172	AT1G59590	ZCF37	0.876187	1.83552	7.8796	235.503	6.00026	0.0003764	0.0305034
260819_at	15919	AT1G06850	ATBZIP52 (BASIC LEUCINE-ZIPPER 52); bZIP transcription factor, putative	0.879884	1.84023	6.32227	80.019	6.69691	0.000182687	0.0227683
249983_at	5083	AT5G18470	curculin-like (mannose-binding) lectin family protein	0.881811	1.84269	4.9032	29.9233	6.17984	0.000310702	0.0289898
249208_at	4308	AT5G42650	AOS (ALLENE OXIDE SYNTHASE); hydro-lyase/ oxygen binding	0.884352	1.84594	7.28651	156.12	9.33332	1.83262e-05	0.00589226
251026_at	6126	AT5G02200	FHL (FAR-RED-ELONGATED HYPOCOTYL1-LIKE); phytochrome A specific signal transduction component	0.886093	1.84816	4.71407	26.2469	5.69796	0.000524603	0.0347263
257769_at	12869	AT3G23050	IAA7 (AUXIN RESISTANT 2); transcription factor	0.887238	1.84963	11.8893	3793.47	5.19732	0.000933338	0.0451048
260181_at	15281	AT1G70710	CEL1 (CELLULASE 1); hydrolase, hydrolyzing O-glycosyl compounds	0.887664	1.85018	8.8099	448.79	7.53056	8.2483e-05	0.0150381
261109_at	16209	AT1G75450	CKX5 (CYTOKININ OXIDASE 5); cytokinin dehydrogenase	0.891759	1.85544	6.16936	71.9719	5.02706	0.00114427	0.0495272
245328_at	428	AT4G14465	AHL20 (AT-HOOK MOTIF NUCLEAR-LOCALIZED PROTEIN 20); AT-hook motif protein	0.893748	1.858	7.46734	176.968	6.01776	0.000369363	0.0303064
256756_at	11856	AT3G25610	haloacid dehalogenase-like hydrolase family protein	0.901481	1.86798	6.29263	78.3918	6.04296	0.000359489	0.0299268
257206_at	12306	AT3G16530	lectin family protein	0.902178	1.86888	7.13998	141.042	5.69287	0.000527598	0.0347263
252193_at	7293	AT3G50060	MYB77 (MYB DOMAIN PROTEIN 77); myb family transcription factor	0.903979	1.87122	8.46833	354.177	5.51889	0.000642167	0.0377009
262801_at	17901	AT1G21010	polymerase; similar to unknown protein [Arabidopsis thaliana] (TAIR:AT1G76600.1)	0.904104	1.87138	6.59901	96.9396	5.40347	0.000733222	0.0398209
263016_at	18116	AT1G23410	ribosomal protein S27a / Ubiquitin family protein	0.908636	1.87727	6.28015	77.7166	9.75883	1.33202e-05	0.00516642
260144_at	15244	AT1G71960	ABCG25 (ARABIDOPSIS THALIANA ATP-BINDING CASSETTE G25); ABC transporter family protein	0.913236	1.88326	6.75696	108.155	7.39567	9.3363e-05	0.0162566
262485_at	17585	AT1G21730	KIN7.1 (KINESIN7.1); P-loop containing nucleoside triphosphate hydrolases superfamily protein	0.913276	1.88332	5.5165	45.7754	7.32581	9.96197e-05	0.0163894
257062_at	12162	AT3G18290	EMB2454 (EMBRYO DEFECTIVE 2454); protein binding / zinc ion binding	0.91436	1.88473	9.24171	605.387	5.59001	0.000592317	0.0359328
259997_at	15097	AT1G67880	beta-1,4-N-acetylglucosaminyltransferase protein family	0.916541	1.88758	7.58633	192.182	5.52771	0.000635741	0.0377009
266447_at	21547	AT2G43290	MSS3 (MULTICOPY SUPPRESSORS OF SNF4 DEFICIENCY IN YEAST 3); calcium ion binding	0.918788	1.89053	8.7243	422.937	5.35192	0.0007784	0.0415815
263662_at	18762	AT1G04430	S-adenosyl-L-methionine-dependent methyltransferases superfamily protein	0.919312	1.89121	10.2691	1234	6.21823	0.000298368	0.028123
253414_at	8514	AT4G33050	EDA39 (embryo sac development arrest 39); calmodulin binding	0.920625	1.89294	7.10959	138.102	6.97913	0.000138452	0.0201153
262299_at	17399	AT1G27520	MNS5 (MANNOSIDASE 5)	0.923494	1.8967	7.9956	255.22	6.48669	0.000225874	0.0255602
262868_at	17968	AT1G64980	putative nucleotide-diphospho-sugar transferase	0.929071	1.90405	9.22529	598.533	7.55016	8.10232e-05	0.0149043
264157_at	19257	AT1G65310	ATXTH17 (XYLOGLUCAN ENDOTRANSGLUCOSYLASE/HYDROLASE 17); hydrolase, acting on glycosyl bonds	0.937691	1.91546	5.82117	56.5389	5.51688	0.000643643	0.0377009
250670_at	5770	AT5G06865;AT5G06860	[AT5G06860, PGIP1 (POLYGALACTURONASE INHIBITING PROTEIN 1); protein binding]	0.937843	1.91566	8.55388	375.814	5.74815	0.000496071	0.0340185
266326_at	21426	AT2G46650	B5 #1 (cytochrome b5 family protein #1); heme binding / transition metal ion binding	0.946855	1.92767	6.29497	78.519	6.08747	0.000342752	0.0291723
246858_at	1958	AT5G25930	leucine-rich repeat family protein / protein kinase family protein	0.951964	1.93451	6.95948	124.455	5.28178	0.000844881	0.0431135
256303_at	11403	AT1G69550	disease resistance protein (TIR-NBS class), putative	0.968132	1.95631	3.81259	14.0508	9.41646	1.72019e-05	0.00589226
258101_at	13201	AT3G23590	MED33A/MED5A (MEDIATOR 5A)	0.968621	1.95697	7.9055	239.769	8.60532	3.25938e-05	0.00874664
260806_at	15906	AT1G78260	RNA-binding (RRM/RBD/RNP motifs) family protein	0.970757	1.95987	7.82333	226.494	6.21973	0.000297898	0.028123
261032_at	16132	AT1G17430	hydrolase, alpha/beta fold family protein	0.977546	1.96911	6.60619	97.4232	7.80207	6.46126e-05	0.0127053
264515_at	19615	AT1G10090	ERD4 (Early-responsive to dehydration stress protein)	0.978621	1.97058	7.34056	162.08	6.54044	0.000213842	0.0249594
265075_at	20175	AT1G55450	S-adenosyl-L-methionine-dependent methyltransferases superfamily protein	0.983722	1.97756	7.71409	209.977	5.15422	0.000982365	0.0461065
260934_at	16034	AT1G45100	RNA-binding (RRM/RBD/RNP motifs) family protein	0.98401	1.97796	4.2819	19.4528	10.9364	5.84544e-06	0.00317463
264658_at	19758	AT1G09910	Rhamnogalacturonate lyase family protein	0.990347	1.98666	7.66449	202.881	10.0275	1.09569e-05	0.00478513
252053_at	7153	AT3G52400	SYP122 (SYNTAXIN 122); t-SNARE	0.99331	1.99075	6.4349	86.5161	6.80435	0.000164221	0.0218401
265841_at	20941	AT2G35710	glycogenin glucosyltransferase (glycogenin)-related	0.998925	1.99851	6.14338	70.6871	5.49173	0.000662414	0.0382796
264826_at	19926	AT1G03410	2-oxoglutarate (2OG) and Fe(II)-dependent oxygenase superfamily protein	1.0002	2.00028	4.93838	30.662	7.56161	8.01833e-05	0.0148698
257990_at	13090	AT3G19860	basic helix-loop-helix (bHLH) family protein	1.01006	2.01399	8.41997	342.503	7.15556	0.000116919	0.0181424
250279_at	5379	AT5G13200	GRAM domain-containing protein / ABA-responsive protein-related	1.01412	2.01967	6.5776	95.5115	5.11656	0.00102752	0.0466389
248611_at	3711	AT5G49520	WRKY48 (WRKY DNA-binding protein 48); transcription factor	1.0171	2.02385	5.77255	54.6651	6.55516	0.000210674	0.0247705
252346_at	7446	AT3G48650	pseudogene of pectinesterase	1.0199	2.02778	4.68559	25.7338	5.25841	0.000868399	0.0439206
267293_at	22393	AT2G23810	TET8 (TETRASPANIN8)	1.02074	2.02896	10.468	1416.38	5.80603	0.000465272	0.0329592
245193_at	293	AT1G67810	Fe-S metabolism associated domain-containing protein	1.02153	2.03007	5.76202	54.2675	10.0623	1.0687e-05	0.0047798
256977_at	12077	AT3G21040	copia-like retrotransposon family transposable element protein	1.02924	2.04095	4.79766	27.8124	9.39416	1.74957e-05	0.00589226
263073_at	18173	AT2G17500	PILS5 (PIN-LIKES5); auxin efflux carrier family protein	1.03119	2.04371	7.44832	174.65	8.36936	3.96269e-05	0.00982489
247708_at	2808	AT5G59550	RING-DUF1117 protein; zinc finger (C3HC4-type RING finger) family protein	1.03125	2.04379	9.16469	573.912	5.03278	0.00113639	0.0493736
265856_at	20956	AT2G42430	LBD16 (ASYMMETRIC LEAVES2-LIKE16) DNA binding protein	1.03371	2.04729	5.33806	40.4499	7.29361	0.00010266	0.0167262
245859_at	959	AT5G28290	AtNek3; NIMA-related serine/threonine kinase	1.06459	2.09157	7.35537	163.753	9.93992	1.16714e-05	0.00493008
264824_at	19924	AT1G03420	2-oxoglutarate (2OG) and Fe(II)-dependent oxygenase superfamily proteins	1.06459	2.09158	7.97252	251.171	12.0074	2.95212e-06	0.00214419
256299_at	11399	AT1G69530	ATEXPA1 (ARABIDOPSIS THALIANA EXPANSIN A1)	1.06864	2.09746	11.5019	2900.07	5.84152	0.000447438	0.0323103
252870_at	7970	AT4G39940	AKN2 (APS-KINASE 2); ATP binding / kinase/ transferase, transferring phosphorus-containing groups	1.07096	2.10084	7.72735	211.917	8.78337	2.82081e-05	0.00824906
259854_at	14954	AT1G72200	RING/U-box superfamily; zinc finger (C3HC4-type RING finger) family protein	1.07718	2.1099	5.03063	32.6866	9.87407	1.22429e-05	0.00507745
246777_at	1877	AT5G27420	CNI1 (CARBON/NITROGEN INSENSITIVE 1) RING E3 ligase; zinc finger (C3HC4-type RING finger) family protein	1.07886	2.11236	6.15592	71.3044	5.65181	0.000552441	0.0352348
249918_at	5018	AT5G19240	glycoprotein membrane precursor GPI-anchored	1.0858	2.12255	9.93973	982.104	5.76535	0.000486689	0.033742
246018_at	1118	AT5G10695	methionyl-tRNA synthetase protein	1.08907	2.12737	7.47624	178.063	6.98966	0.00013705	0.0200391
250676_at	5776	AT5G06320	NHL3 (NDR1/HIN1-like 3)	1.08912	2.12745	9.56429	757.073	5.59819	0.000586862	0.0357923
259274_at	14374	AT3G01220	ATHB20 (ARABIDOPSIS THALIANA HOMEOBOX PROTEIN 20); DNA binding / transcription factor	1.09471	2.1357	5.01309	32.2916	10.7371	6.6816e-06	0.0034638
263931_at	19031	AT2G36220	similar to unknown protein [Arabidopsis thaliana] (TAIR:AT3G52710.1); similar to Os11g0153300 [Oryza sativa (japonica cultivar-group)] (GB:NP_001065777.1); similar to calcium/calmodulin protein kinase 1 [Nicotiana tabacum] (GB:AAN71903.1)	1.10047	2.14424	9.61791	785.74	6.24807	0.000289157	0.0280666
264052_at	19152	AT2G22330	CYP79B3 (cytochrome P450, family 79, subfamily B, polypeptide 3); oxygen binding	1.11586	2.16725	9.41265	681.538	6.29121	0.000276392	0.027503
256093_at	11193	AT1G20823	ATL80 RING E3 ubiquitin ligase; zinc finger (C3HC4-type RING finger) family protein	1.1226	2.17739	7.14473	141.507	6.15483	0.000319036	0.0289898
258137_at	13237	AT3G24515	UBC37 (ubiquitin-conjugating enzyme 34); ubiquitin-protein ligase	1.14868	2.21711	5.33231	40.2889	13.9385	9.80559e-07	0.00118737
264577_at	19677	AT1G05260	RCI3 (RARE COLD INDUCIBLE GENE 3); peroxidase	1.16148	2.23688	6.64354	99.9778	5.77633	0.000480805	0.0335518
260656_at	15756	AT1G19380	similar to unknown protein [Arabidopsis thaliana] (TAIR:AT5G65650.1); similar to unknown [Vitis pseudoreticulata] (GB:ABC69762.1); contains InterPro domain Protein of unknown function DUF1195; (InterPro:IPR010608)	1.1619	2.23751	9.13974	564.072	5.3066	0.000820671	0.042338
247949_at	3049	AT5G57220	CYP81F2 (cytochrome P450, family 81, subfamily F, polypeptide 2); oxygen binding	1.16666	2.24491	5.67623	51.1348	8.15933	4.73366e-05	0.010818
256877_at	11977	AT3G26470	powdery mildew resistance protein, RPW8 domain-containing protein	1.17024	2.25049	5.27205	38.6408	6.67318	0.00018707	0.0230652
253915_at	9015	AT4G27280	calcium-binding EF hand family protein	1.17736	2.26162	11.6688	3255.72	7.5228	8.30687e-05	0.0150381
247640_at	2740	AT5G60610	F-box family protein	1.18736	2.27736	6.17058	72.0326	14.7993	6.27584e-07	0.00102251
263182_at	18282	AT1G05575	transmembrane protein	1.19505	2.28953	7.35397	163.593	7.35427	9.70162e-05	0.0162716
266545_at	21645	AT2G35290	SAUR79 (SMALL AUXIN UPREGULATED RNA 79)	1.19839	2.29483	6.61287	97.8748	5.2716	0.000855035	0.0433408
258792_at	13892	AT3G04640	glycine-rich protein	1.20962	2.31276	8.50212	362.57	5.09745	0.00105131	0.04731
255773_at	10873	AT1G18590	SOT17 (SULFOTRANSFERASE 17)	1.23292	2.35042	6.12257	69.6748	6.14808	0.000321331	0.0289898
260211_at	15311	AT1G74440	ER membrane protein, putative	1.2364	2.3561	5.27043	38.5972	7.60448	7.71253e-05	0.0145391
245731_at	831	AT1G73500	ATMKK9 (Arabidopsis thaliana MAP kinase kinase 9); kinase	1.24535	2.37076	7.87625	234.956	8.64245	3.16196e-05	0.00858623
263126_at	18226	AT1G78460	SOUL heme-binding family protein	1.24698	2.37345	9.32231	640.168	10.696	6.87036e-06	0.00348251
264000_at	19100	AT2G22500	mitochondrial substrate carrier family protein	1.26459	2.40259	9.70434	834.252	5.54268	0.000624995	0.0375161
254447_at	9547	AT4G20860	BBE22 (BERBERINE BRIDGE ENZYME 22)	1.2706	2.41262	5.50625	45.4514	5.884	0.000427075	0.0320278
257638_at	12738	no_match	no_match	1.28778	2.44151	4.29335	19.6077	5.78791	0.000474682	0.0334182
256875_at	11975	AT3G26330	CYP71B37 (cytochrome P450, family 71, subfamily B, polypeptide 37); oxygen binding	1.30246	2.46649	5.02611	32.5845	15.266	4.97721e-07	0.000873308
266037_at	21137	AT2G05940	RIPK (RPM1-INDUCED PROTEIN KINASE)	1.30367	2.46855	8.33814	323.617	7.46875	8.72826e-05	0.0156765
266800_at	21900	AT2G22880	VQ12; VQ motif-containing protein	1.30781	2.47565	6.90624	119.946	5.42073	0.000718742	0.0396003
248719_at	3819	AT5G47910	RBOHD (RESPIRATORY BURST OXIDASE PROTEIN D)	1.3082	2.47633	7.86641	233.36	5.33736	0.000791711	0.0419417
249928_at	5028	AT5G22250	CAF1B (CCR4-ASSOCIATED FACTOR 1B); CCR4-NOT transcription complex protein	1.3107	2.48062	7.27479	154.857	6.36641	0.000255608	0.0263536
254481_at	9581	AT4G20480	putative endonuclease or glycosyl hydrolase	1.31475	2.48759	5.87026	58.4957	14.2846	8.17042e-07	0.00118737
257197_at	12297	AT3G23800	selenium-binding protein 3	1.32029	2.49717	5.88227	58.9848	6.02875	0.00036502	0.0302362
264449_at	19549	AT1G27460	NPGR1 (NO POLLEN GERMINATION RELATED 1); calmodulin binding	1.33636	2.52514	6.59146	96.4334	7.2491	0.000107034	0.0171933
248799_at	3899	AT5G47230	ERF5 (ETHYLENE RESPONSIVE ELEMENT BINDING FACTOR 5); DNA binding / transcription factor/ transcriptional activator	1.33849	2.52887	7.49987	181.003	5.12879	0.00101261	0.0462666
260201_at	15301	AT1G67600	Acid phosphatase/vanadium-dependent haloperoxidase-related protein	1.3483	2.54611	5.3587	41.0327	11.3631	4.42183e-06	0.00288177
252827_at	7927	AT4G39950	CYP79B2 (cytochrome P450, family 79, subfamily B, polypeptide 2); oxygen binding	1.34932	2.54791	7.92682	243.338	6.02085	0.000368137	0.0303064
252908_at	8008	AT4G39670	Glycolipid transfer protein (GLTP) family protein	1.35206	2.55276	5.46409	44.1422	5.64902	0.000554178	0.0352348
258139_at	13239	AT3G24520;AT3G24518	[AT3G24520, AT-HSFC1 (Arabidopsis thaliana heat shock transcription factor C1); DNA binding / transcription factor]	1.35223	2.55306	6.90756	120.055	8.65818	3.12168e-05	0.00858623
259934_at	15034	AT1G71340	GDPD4 (GLYCEROPHOSPHODIESTER PHOSPHODIESTERASE 4)	1.35598	2.5597	6.73489	106.513	13.8253	1.04183e-06	0.00118737
253534_at	8634	AT4G31500	CYP83B1 (CYTOCHROME P450 MONOOXYGENASE 83B1); oxygen binding	1.35841	2.56403	8.90765	480.254	11.1029	5.23644e-06	0.00298608
260037_at	15137	AT1G68840	RAV2 (REGULATOR OF THE ATPASE OF THE VACUOLAR MEMBRANE); DNA binding / transcription factor	1.36323	2.57261	9.61163	782.33	7.64881	7.40986e-05	0.0140849
260227_at	15327	AT1G74450	similar to unknown protein [Arabidopsis thaliana] (TAIR:AT1G18740.1); similar to Protein of unknown function DUF793 [Medicago truncatula] (GB:ABE83157.1); contains InterPro domain Protein of unknown function DUF793; (InterPro:IPR008511)	1.3641	2.57416	8.43849	346.928	6.76723	0.000170355	0.0219537
245119_at	219	AT2G41640	Glycosyltransferase family 61 protein	1.36819	2.58146	6.41928	85.5845	5.3112	0.000816265	0.0422199
245757_at	857	AT1G35140	PHI-1 (PHOSPHATE-INDUCED 1)	1.36852	2.58206	7.97597	251.771	5.09808	0.00105052	0.04731
262080_at	17180	AT1G59650	CW14	1.38414	2.61017	7.03478	131.123	9.39855	1.74375e-05	0.00589226
256017_at	11117	AT1G19180	JAZ1 jasmonate signaling protein	1.39452	2.62902	8.75816	432.981	5.923	0.000409281	0.0320278
252863_at	7963	AT4G39800	MI-1-P SYNTHASE (Myo-inositol-1-phosphate synthase); inositol-3-phosphate synthase	1.40953	2.6565	9.20643	590.76	11.8686	3.21517e-06	0.00222236
262832_s_at	17932	AT1G14870;AT1G14880	[AT1G14870, PCR2 membrane protein involved in zinc transport];[AT1G14880, PCR1 (PLANT CADMIUM RESISTANCE 1)]	1.41273	2.66241	7.77776	219.451	13.2865	1.39909e-06	0.00138753
264166_at	19266	AT1G65370	meprin and TRAF homology domain-containing protein / MATH domain-containing protein	1.41298	2.66287	4.92334	30.344	7.09363	0.000124022	0.0187347
262114_at	17214	AT1G02860	SPX (SYG1/Pho81/XPR1) domain-containing protein / zinc finger (C3HC4-type RING finger) protein-related	1.43195	2.69811	7.59529	193.38	11.0098	5.56766e-06	0.00309752
253830_at	8930	AT4G27652	similar to unknown protein [Arabidopsis thaliana] (TAIR:AT4G27657.1)	1.43479	2.70344	9.1142	554.177	6.15447	0.000319159	0.0289898
253827_at	8927	AT4G28085	transmembrane protein	1.43923	2.71176	5.29104	39.1526	8.68206	3.06162e-05	0.00858623
245329_at	429	AT4G14365	XBAT34 (XB3 ORTHOLOG 4 IN ARABIDOPSIS THALIANA)	1.43998	2.71317	6.03549	65.5938	7.19249	0.0001129	0.0177604
260135_at	15235	AT1G66400	CML23 (CALMODULIN LIKE 23)	1.45658	2.74457	6.29821	78.6955	7.66363	7.31164e-05	0.0140849
263800_at	18900	AT2G24600	ankyrin repeat family protein	1.45715	2.74566	6.80614	111.906	6.26202	0.000284957	0.0280666
253409_at	8509	AT4G32960	BRISC/BRCA1-A complex protein	1.46378	2.75831	7.82997	227.539	15.3787	4.71102e-07	0.000873308
263935_at	19035	AT2G35930	PUB23 (PLANT U-BOX23); U-box domain-containing protein	1.46538	2.76136	7.96105	249.182	6.09798	0.000338924	0.0291682
251336_at	6436	AT3G61190	BAP1 (BON ASSOCIATION PROTEIN 1)	1.47677	2.78325	8.25919	306.383	5.74443	0.000498122	0.0340185
258170_at	13270	AT3G21600	senescence/dehydration-associated protein-related	1.47837	2.78633	6.09923	68.557	12.6692	1.98879e-06	0.00168016
250828_at	5928	AT5G05250	similar to unknown protein [Arabidopsis thaliana] (TAIR:AT3G56360.1); similar to unknown protein [Oryza sativa (japonica cultivar-group)] (GB:AAP03420.1)	1.47865	2.78689	7.59277	193.041	11.1513	5.07286e-06	0.00298608
256755_at	11855	AT3G25600	CML16 (CALMODULIN LIKE 16)	1.4905	2.80985	8.63004	396.189	11.2123	4.87495e-06	0.00298608
251774_at	6874	AT3G55840	Hs1pro-1 protein	1.5142	2.8564	7.59145	192.866	5.51834	0.000642575	0.0377009
254120_at	9220	AT4G24570	DIC2 (DICARBOXYLATE CARRIER 2); mitochondrial substrate carrier family protein	1.51501	2.85801	9.70298	833.467	5.22225	0.000906208	0.0446532
247177_at	2277	AT5G65300	similar to Avr9/Cf-9 rapidly elicited protein 75 [Nicotiana tabacum] (GB:AAG43558.1)	1.52057	2.86905	7.18988	146.005	8.26282	4.33462e-05	0.0102435
255753_at	10853	AT1G18570	MYB51 (myb domain protein 51); DNA binding / transcription factor	1.5351	2.89809	7.47641	178.084	7.05122	0.000129161	0.019256
256633_at	11733	AT3G28340	GATL10 (Galacturonosyltransferase-like 10); polygalacturonate 4-alpha-galacturonosyltransferase/ transferase, transferring hexosyl groups	1.56569	2.96019	7.75821	216.498	6.29692	0.000274751	0.0274871
267083_at	22183	AT2G41100	TCH3 (TOUCH 3); calmodium-like protein	1.56679	2.96246	11.0942	2186.16	9.33229	1.83407e-05	0.00589226
249719_at	4819	AT5G35735	auxin-responsive family protein	1.57933	2.98832	8.07402	269.478	5.21803	0.000910739	0.0446752
266316_at	21416	AT2G27080	NHL13 (NDR/HIN1-LIKE 13); LEA family glycoprotein family	1.59795	3.02712	7.13007	140.076	6.7782	0.000168516	0.0218401
260693_at	15793	AT1G32450	NPF7.3 (NITRATE TRANSPORTER 1.5)	1.60277	3.03725	7.15287	142.308	8.92242	2.52406e-05	0.00747711
245041_at	141	AT2G26530	AR781	1.61558	3.06435	7.93456	244.648	5.76263	0.000488157	0.033742
264580_at	19680	AT1G05340	CRTM1 (CYSTEINE-RICH TRANSMEMBRANE MODULE 1)	1.6231	3.08036	7.70047	208.004	9.42894	1.70399e-05	0.00589226
260744_at	15844	AT1G15010	mediator of RNA polymerase II transcription subunit	1.62331	3.08082	6.68728	103.056	6.40603	0.000245359	0.0261525
256009_at	11109	AT1G19210	ERF17; DREB subfamily AP2 domain-containing transcription factor	1.62748	3.08973	5.99076	63.5913	5.62019	0.000572461	0.0352348
258027_at	13127	AT3G19515	apoptosis inhibitor protein	1.64159	3.1201	6.1881	72.9127	13.0168	1.62836e-06	0.00154763
250476_at	5576	AT5G10140	FLC (FLOWERING LOCUS C); transcription factor	1.65232	3.14339	5.93552	61.2025	13.896	1.00307e-06	0.00118737
253073_at	8173	AT4G37410	CYP81F4 (cytochrome P450, family 81, subfamily F, polypeptide 4); oxygen binding	1.6687	3.17927	7.4896	179.719	10.2832	9.13649e-06	0.00443411
261648_at	16748	AT1G27730	STZ (SALT TOLERANCE ZINC FINGER); nucleic acid binding / transcription factor/ zinc ion binding	1.67453	3.19216	9.13916	563.847	5.42416	0.000715899	0.0395391
257476_at	12576	AT1G80960	F-box and leucine rich-repeat containing protein	1.71329	3.27908	4.9229	30.3348	15.9647	3.56077e-07	0.000800854
256442_at	11542	AT3G10930	IDL7 (IDA-LIKE7); secreted peptide	1.74438	3.3505	7.31902	159.678	6.288	0.00027732	0.027503
262099_s_at	17199	AT4G37390;AT1G59500	[AT4G37390, YDK1 (AUXIN UPREGULATED1, YADOKARI 1); indole-3-acetic acid amido synthetase];[AT1G59500, GH3.4; indole-3-acetic acid amido synthetase]	1.77111	3.41315	5.60679	48.7317	5.45946	0.00068739	0.0385466
247327_at	2427	AT5G64120	PRX71 (PEROXIDASE 71); cell wall bound peroxidase	1.77368	3.41926	8.01454	258.592	6.9915	0.000136807	0.0200391
254042_at	9142	AT4G25810	XTR6 (XYLOGLUCAN ENDOTRANSGLYCOSYLASE 6); hydrolase, acting on glycosyl bonds	1.80451	3.4931	6.65847	101.018	8.3212	4.12622e-05	0.0101203
248270_at	3370	AT5G53450	ORG1 (OBP3-RESPONSIVE GENE 1); kinase	1.81415	3.51652	9.83307	912.117	7.38521	9.42717e-05	0.0162716
257628_at	12728	AT3G26290	CYP71B26 (cytochrome P450, family 71, subfamily B, polypeptide 26); oxygen binding	1.81541	3.51961	7.58815	192.424	14.1778	8.63993e-07	0.00118737
253643_at	8743	AT4G29780	nuclease; similar to unknown protein [Arabidopsis thaliana] (TAIR:AT5G12010.1); similar to Os01g0582600 [Oryza sativa (japonica cultivar-group)] (GB:NP_001043414.1); similar to Os05g0593000 [Oryza sativa (japonica cultivar-group)] (GB:NP_001056499.1); similar to unknown protein [Oryza sativa (japonica cultivar-group)] (GB:BAD72250.1)	1.86752	3.64906	9.30879	634.198	5.71583	0.000514238	0.0341976
261892_at	16992	AT1G80840	WRKY40 (WRKY DNA-binding protein 40); transcription factor	1.87695	3.67297	8.6988	415.527	5.04721	0.00111677	0.0490906
248164_at	3264	AT5G54490	PBP1 (PINOID-BINDING PROTEIN 1); calcium ion binding	1.87726	3.67377	7.65788	201.954	7.25853	0.000106091	0.0171626
253628_at	8728	AT4G30280	ATXTH18/XTH18 (XYLOGLUCAN ENDOTRANSGLUCOSYLASE/HYDROLASE 18); hydrolase, acting on glycosyl bonds	1.88141	3.68435	8.59639	387.053	7.11489	0.00012153	0.0184807
264751_at	19851	AT1G23020	ATFRO3/FRO3 (FERRIC REDUCTION OXIDASE 3); ferric-chelate reductase	1.89446	3.71783	8.39012	335.489	10.2156	9.58238e-06	0.00455363
253832_at	8932	AT4G27654	transmembrane protein	1.89945	3.73071	7.6133	195.809	6.58043	0.000205354	0.0242701
258075_at	13175	AT3G25900	ATHMT-1/HMT-1; homocysteine S-methyltransferase	1.95093	3.86625	8.07108	268.929	10.7417	6.661e-06	0.0034638
258071_s_at	13171	AT3G26080;AT3G26070	[AT3G26080, plastid-lipid associated protein PAP / fibrillin family protein];[AT3G26070, plastid-lipid associated protein PAP / fibrillin family protein]	1.99955	3.99874	9.72559	846.634	23.622	1.84605e-08	0.000154063
259479_at	14579	AT1G19020	CDP-diacylglycerol-glycerol-3-phosphate 3-phosphatidyltransferase	2.03688	4.10358	8.17942	289.901	12.7243	1.92605e-06	0.00168016
258434_at	13534	AT3G16770	ATEBP/RAP2.3 (RELATED TO AP2 3); DNA binding / protein binding / transcription factor/ transcriptional activator	2.13024	4.37791	7.59908	193.888	13.736	1.09315e-06	0.00118737
252882_at	7982	AT4G39675	unknown protein	2.1907	4.56526	6.79074	110.717	12.1168	2.76174e-06	0.00214419
256337_at	11437	AT1G72070;AT1G72060	[AT1G72070, DNAJ heat shock N-terminal domain-containing protein];[AT1G72060, serine-type endopeptidase inhibitor]	2.22968	4.6903	6.26124	76.7046	11.2258	4.8325e-06	0.00298608
247988_at	3088	AT5G56910	cysteine protease inhibitor	2.2797	4.85578	6.73334	106.399	17.2712	1.9728e-07	0.000562494
250059_at	5159	AT5G17820	PER57 (PEROXIDASE 57) (PRXR10)	2.31144	4.96379	7.03045	130.73	5.46729	0.000681234	0.0385466
264101_at	19201	AT1G79000	HAC1 (P300/CBP acetyltransferase-related protein 2 gene); transcription cofactor	2.33182	5.0344	7.22622	149.73	14.1176	8.9175e-07	0.00118737
256994_s_at	12094	AT3G25820;AT3G25830	[AT3G25820, ATTPS-CIN (TERPENE SYNTHASE-LIKE SEQUENCE-1,8-CINEOLE); myrcene/(E)-beta-ocimene synthase];[AT3G25830, ATTPS-CIN (TERPENE SYNTHASE-LIKE SEQUENCE-1,8-CINEOLE); myrcene/(E)-beta-ocimene synthase]	2.34546	5.08223	8.01593	258.842	6.44148	0.000236573	0.0261525
249346_at	4446	AT5G40780	LHT1 (LYSINE HISTIDINE TRANSPORTER 1); amino acid permease/ amino acid transporter	2.38338	5.21757	6.97847	126.104	5.45775	0.000688742	0.0385466
265051_at	20151	AT1G52100	jacalin lectin family protein	2.49971	5.65573	6.50908	91.081	20.2245	5.99492e-08	0.000273488
264100_at	19200	AT1G78970	LUP1 (LUPEOL SYNTHASE 1); lupeol synthase	2.55413	5.87311	8.91692	483.35	11.1338	5.13128e-06	0.00298608
259573_at	14673	AT1G20390	gypsy-like retrotransposon family protein	2.82674	7.09469	5.6842	51.4178	23.3343	2.02625e-08	0.000154063
253259_at	8359	AT4G34410	ERF 109 (ETHYLENE RESPONSE FACTOR 109)	2.88236	7.37356	7.2471	151.913	5.33502	0.000793874	0.0419417
245736_at	836	AT1G73330	ATDR4 (Arabidopsis thaliana drought-repressed 4)	4.18203	18.1517	7.83086	227.68	28.7395	4.14529e-09	9.4554e-05
